# Supplementary material for: American Heart Association’s Life’s Simple 7: Lifestyle Recommendations, Polygenic Risk, and Lifetime Risk of Coronary Heart Disease
Source: PubMed Central journal article supplement — Circulation. 2022 Jan 31;145(11):808–18. doi: 10.1161/CIRCULATIONAHA.121.053730 (PMC8912968; doi:10.1161/circulationaha.121.053730), 2022-01-31
Supplement: cir-145-808-s001.pdf [file cir-145-808-s001.pdf]

## SUPPLEMENTAL MATERIAL

for

**American Heart Association’s Life’s Simple 7 lifestyle recommendations,  
polygenic risk, and lifetime risk of coronary heart disease**

### TABLE OF CONTENTS

|                                                                                                                                                  |           |
|--------------------------------------------------------------------------------------------------------------------------------------------------|-----------|
| <b>Supplemental Table 1. Baseline characteristics of the study population according to Life’s Simple 7 score.....</b>                            | <b>2</b>  |
| <b>Supplemental Table 2. Remaining lifetime risk for CHD according to Life’s Simple 7 cardiovascular health factors in all participants.....</b> | <b>3</b>  |
| <b>Supplemental Table 3. Relative risk of incident CHD by individual LS7 health factors in the total study population.....</b>                   | <b>4</b>  |
| <b>Supplemental Table 4. CHD-free years and Overall Survival according to polygenic risk and Life’s Simple 7.....</b>                            | <b>5</b>  |
| <b>Supplemental Table 5. Lifetime risk and years free of CHD according to polygenic risk and Life’s Simple 7, by race and sex.....</b>           | <b>6</b>  |
| <b>Supplemental Table 6. Lifetime risk of CHD according to polygenic risk and Life’s Simple 7*.....</b>                                          | <b>7</b>  |
| <b>Supplemental Table 7: Lifetime risk of CHD according to polygenic risk and family history of CHD*.....</b>                                    | <b>8</b>  |
| <b>Supplemental Figure 1. Relative risk of CHD according to polygenic risk and Life’s Simple 7 according to race.....</b>                        | <b>9</b>  |
| <b>Supplemental Figure 2. Years free of CHD and Overall Survival according to polygenic risk and lifestyle stratified by sex.....</b>            | <b>10</b> |

**Supplemental Table 1. Baseline characteristics of the study population according to Life's Simple 7 score**

| Baseline Characteristics | Ideal LS7 (N=3,100) | Intermediate LS7 (N=6,853) | Poor LS7 (N=733) | P*     | Trend P† |
|--------------------------|---------------------|----------------------------|------------------|--------|----------|
| Age, median [min,max]    | 52.0 [45.0, 65.0]   | 54.0 [45.0, 66.0]          | 55.0[45.0, 66.0] | <0.001 | <0.001   |
| Female, n (%)            | 1942 (62.6%)        | 3686 (53.8%)               | 456 (62.2%)      | <0.001 | <0.001   |
| Family History of CHD‡   |                     |                            |                  | 0.04   | 0.07     |
| No                       | 1883 (60.7%)        | 3984 (58.1%)               | 411 (56.1%)      |        |          |
| Yes                      | 905 (29.2%)         | 2163 (31.6%)               | 212 (28.9%)      |        |          |
| Yes, premature CHD       | 272 (8.8%)          | 563 (8.2%)                 | 73 (10.0%)       |        |          |
| BMI                      |                     |                            |                  | <0.001 | <0.001   |
| Poor                     | 137 (4.4%)          | 2129 (31.1%)               | 500 (68.2%)      |        |          |
| Intermediate             | 1052 (33.9%)        | 3015 (44.0%)               | 195 (26.6%)      |        |          |
| Ideal                    | 1911 (61.6%)        | 1709 (24.9%)               | 38 (5.2%)        |        |          |
| Blood pressure           |                     |                            |                  | <0.001 | <0.001   |
| Poor                     | 138 (4.5%)          | 2132 (31.1%)               | 515 (70.3%)      |        |          |
| Intermediate             | 647 (20.9%)         | 2454 (35.8%)               | 168 (22.9%)      |        |          |
| Ideal                    | 2315 (74.7%)        | 2267 (33.1%)               | 50 (6.8%)        |        |          |
| Blood Sugar              |                     |                            |                  | <0.001 | <0.001   |
| Poor                     | 20 (0.6%)           | 562 (8.2%)                 | 269 (36.7%)      |        |          |
| Intermediate             | 645 (20.8%)         | 3131 (45.7%)               | 361 (49.2%)      |        |          |
| Ideal                    | 2435 (78.5%)        | 3160 (46.1%)               | 103 (14.1%)      |        |          |
| Total Cholesterol        |                     |                            |                  | <0.001 | <0.001   |
| Poor                     | 242 (7.8%)          | 2060 (30.1%)               | 449 (61.3%)      |        |          |
| Intermediate             | 1065 (34.4%)        | 2700 (39.4%)               | 214 (29.2%)      |        |          |
| Ideal                    | 1793 (57.8%)        | 2093 (30.5%)               | 70 (9.5%)        |        |          |
| Physical Activity        |                     |                            |                  | <0.001 | <0.001   |
| Poor                     | 293 (9.5%)          | 2959 (43.2%)               | 608 (82.9%)      |        |          |
| Intermediate             | 757 (24.4%)         | 1783 (26.0%)               | 96 (13.1%)       |        |          |
| Ideal                    | 2050 (66.1%)        | 2111 (30.8%)               | 29 (4.0%)        |        |          |
| Diet                     |                     |                            |                  | <0.001 | <0.001   |
| Poor                     | 471 (15.2%)         | 2414 (35.2%)               | 388 (52.9%)      |        |          |
| Intermediate             | 2299 (74.2%)        | 4204 (61.3%)               | 337 (46.0%)      |        |          |
| Ideal                    | 330 (10.6%)         | 235 (3.4%)                 | 8 (1.1%)         |        |          |
| Smoking                  |                     |                            |                  |        |          |
| Poor                     | 218 (7.0%)          | 2070 (30.2%)               | 429 (58.5%)      | <0.001 | <0.001   |
| Intermediate             | 59 (1.9%)           | 200 (2.9%)                 | 21 (2.9%)        |        |          |
| Ideal                    | 2823 (91.1%)        | 4583 (66.9%)               | 283 (38.6%)      |        |          |

BMI: body mass index, HDL: high-density lipoproteins, LS7, life's simple 7

\* P values determined using Pearson's chi-square tests and Kruskal-Wallis tests for categorical and continuous variables, respectively.

†P values for trend determined using Jonckheere-Terpstra test for ordinal categorical or continuous variables and Cochran-Armitage tests for binary variables.

‡ Family History is missing for 220 individuals (37 with a poor Life's Simple 7, 143 with an intermediate Life's Simple 7 and 40 with an ideal Life's Simple 7)

**Supplemental Table 2. Remaining lifetime risk for CHD according to Life's Simple 7 cardiovascular health factors in all participants**

| <b>LS7 Health Factor</b>                                  | <b>Category</b> | <b>Lifetime Risk (95% CI)</b> |
|-----------------------------------------------------------|-----------------|-------------------------------|
| Blood Sugar                                               |                 |                               |
|                                                           | Ideal           | 23.4% (21.7-25.1)             |
|                                                           | Intermediate    | 30.5% (27.5-33.6)             |
|                                                           | Poor            | 42.4% (38.1-47.1)             |
| Total Cholesterol                                         |                 |                               |
|                                                           | Ideal           | 21.6% (19.7-23.6)             |
|                                                           | Intermediate    | 28.3 (26.3-30.5)              |
|                                                           | Poor            | 35.2 (31.5-39.2)              |
| Blood pressure                                            |                 |                               |
|                                                           | Ideal           | 21.1 (19.3-23)                |
|                                                           | Intermediate    | 29.9 (26.8-33.3)              |
|                                                           | Poor            | 34.1 (31.7-36.7)              |
| BMI                                                       |                 |                               |
|                                                           | Ideal           | 20.7 (18.8-22.7)              |
|                                                           | Intermediate    | 31.3 (28.7-34.2)              |
|                                                           | Poor            | 30.6 (28.3-33)                |
| Physical activity                                         |                 |                               |
|                                                           | Ideal           | 26.3 (22.9-30.1)              |
|                                                           | Intermediate    | 28.7 (26.1-31.6)              |
|                                                           | Poor            | 28.8 (26.8-30.8)              |
| Healthy diet                                              |                 |                               |
|                                                           | Ideal           | 19.4 (15.6-24)                |
|                                                           | Intermediate    | 27.5 (25.4-29.6)              |
|                                                           | Poor            | 29.2 (27-31.6)                |
| Smoking                                                   |                 |                               |
|                                                           | Ideal           | 26.9 (24.5-29.3)              |
|                                                           | Intermediate    | 30.6 (22.3-41)                |
|                                                           | Poor            | 30 (27.9-32.3)                |
| Abbreviations: BMI: body mass index, LS7: Life's Simple 7 |                 |                               |

**Supplemental Table 3. Relative risk of incident CHD by individual LS7 health factors in the total study population\***

| <b>Cardiovascular Health Factors</b>                                                                                                                                                                                                                                                                                                                                            | <b>HR (95% CI)</b> | <b>P</b>              |
|---------------------------------------------------------------------------------------------------------------------------------------------------------------------------------------------------------------------------------------------------------------------------------------------------------------------------------------------------------------------------------|--------------------|-----------------------|
| <b>Blood Sugar</b>                                                                                                                                                                                                                                                                                                                                                              |                    |                       |
| Ideal                                                                                                                                                                                                                                                                                                                                                                           | 0.93 (0.85-1.03)   | 0.16                  |
| Intermediate                                                                                                                                                                                                                                                                                                                                                                    | Ref                |                       |
| Poor                                                                                                                                                                                                                                                                                                                                                                            | 1.68 (1.46-1.94)   | 1.9x10 <sup>-13</sup> |
| <b>Total Cholesterol</b>                                                                                                                                                                                                                                                                                                                                                        |                    |                       |
| Ideal                                                                                                                                                                                                                                                                                                                                                                           | 0.72 (0.65-0.80)   | 6.4x10 <sup>-9</sup>  |
| Intermediate                                                                                                                                                                                                                                                                                                                                                                    | Ref                |                       |
| Poor                                                                                                                                                                                                                                                                                                                                                                            | 1.23 (1.11-1.37)   | 3.3x10 <sup>-5</sup>  |
| <b>Blood Pressure</b>                                                                                                                                                                                                                                                                                                                                                           |                    |                       |
| Ideal                                                                                                                                                                                                                                                                                                                                                                           | 0.81 (0.73-0.90)   | 0.0002                |
| Intermediate                                                                                                                                                                                                                                                                                                                                                                    | ref                |                       |
| Poor                                                                                                                                                                                                                                                                                                                                                                            | 1.25 (1.12-1.40)   | 7.9x10 <sup>-5</sup>  |
| <b>BMI</b>                                                                                                                                                                                                                                                                                                                                                                      |                    |                       |
| Ideal                                                                                                                                                                                                                                                                                                                                                                           | 0.80 (0.71-0.89)   | 3.7x10 <sup>-5</sup>  |
| Intermediate                                                                                                                                                                                                                                                                                                                                                                    | Ref                |                       |
| Poor                                                                                                                                                                                                                                                                                                                                                                            | 1.07 (0.96-1.18)   | 0.25                  |
| <b>Physical Activity</b>                                                                                                                                                                                                                                                                                                                                                        |                    |                       |
| Ideal                                                                                                                                                                                                                                                                                                                                                                           | 0.84 (0.75-0.94)   | 0.002                 |
| Intermediate                                                                                                                                                                                                                                                                                                                                                                    | ref                |                       |
| Poor                                                                                                                                                                                                                                                                                                                                                                            | 0.97 (0.87-1.09)   | 0.61                  |
| <b>Healthy Diet</b>                                                                                                                                                                                                                                                                                                                                                             | ref                |                       |
| Ideal                                                                                                                                                                                                                                                                                                                                                                           | 0.80 (0.64-1.01)   | 0.056                 |
| Intermediate                                                                                                                                                                                                                                                                                                                                                                    | Ref                |                       |
| Poor                                                                                                                                                                                                                                                                                                                                                                            | 1.03 (0.94-1.13)   | 0.56                  |
| <b>Smoking</b>                                                                                                                                                                                                                                                                                                                                                                  |                    |                       |
| Ideal                                                                                                                                                                                                                                                                                                                                                                           | 0.96 (0.73-1.27)   | 0.77                  |
| Intermediate                                                                                                                                                                                                                                                                                                                                                                    | Ref                |                       |
| Poor                                                                                                                                                                                                                                                                                                                                                                            | 1.36 (1.03-1.81)   | 0.06                  |
| BMI: body mass index, CHD: coronary heart disease, CI: confidence interval, HR: hazard ratio, LS7: Life's Simple 7<br>* HR (95% CI) and <i>p</i> values were calculated using Fine and Gray sub-distribution hazard regression which account for the competing risk of non-CHD death and adjust for all components, polygenic risk score, family history, sex, and study center |                    |                       |

**Supplemental Table 4. CHD-free years and Overall Survival according to polygenic risk and Life's Simple 7**

|                                                                                                                                               | Total Study Population           |                                       | White Americans                  |                                       | Black Americans                  |                                       |
|-----------------------------------------------------------------------------------------------------------------------------------------------|----------------------------------|---------------------------------------|----------------------------------|---------------------------------------|----------------------------------|---------------------------------------|
|                                                                                                                                               | Mean CHD-free years<br>RMST ± SE | Overall Survival (years)<br>RMST ± SE | Mean CHD-free years<br>RMST ± SE | Overall Survival (years)<br>RMST ± SE | Mean CHD-free years<br>RMST ± SE | Overall Survival (years)<br>RMST ± SE |
| <b>PRS</b>                                                                                                                                    |                                  |                                       |                                  |                                       |                                  |                                       |
| Low                                                                                                                                           | 81.5 ± 0.328                     | 83.5 ± 0.283                          | 81.9 ± 0.358                     | 84.0 ± 0.321                          | 80.1 ± 0.703                     | 81.8 ± 0.584                          |
| Intermediate                                                                                                                                  | 79.3 ± 0.197                     | 82.6 ± 0.160                          | 79.6 ± 0.219                     | 83.1 ± 0.175                          | 78.2 ± 0.439                     | 80.5 ± 0.368                          |
| High                                                                                                                                          | 76.6 ± 0.506                     | 81.9 ± 0.400                          | 76.5 ± 0.549                     | 82.6 ± 0.299                          | 77.2 ± 1.107                     | 79.7 ± 1.131                          |
| <b>LS7</b>                                                                                                                                    |                                  |                                       |                                  |                                       |                                  |                                       |
| Ideal                                                                                                                                         | 83.8 ± 0.252                     | 86.1 ± 0.226                          | 83.8 ± 0.267                     | 86.2 ± 0.236                          | 83.9 ± 0.853                     | 84.5 ± 0.832                          |
| Intermediate                                                                                                                                  | 78.1 ± 0.237                     | 81.9 ± 0.187                          | 77.9 ± 0.268                     | 82.3 ± 0.168                          | 78.7 ± 0.473                     | 81.0 ± 0.438                          |
| Poor                                                                                                                                          | 70.3 ± 0.774                     | 75.7 ± 0.508                          | 68.2 ± 1.305                     | 75.6 ± 0.754                          | 72.3 ± 0.885                     | 75.8 ± 0.704                          |
| CHD: coronary heart disease, LS7: life's simple 7, PRS: polygenic risk score, RMST: Irwin's restricted mean survival time, SE: standard error |                                  |                                       |                                  |                                       |                                  |                                       |

**Supplemental Table 5. Lifetime risk and years free of CHD according to polygenic risk and Life's Simple 7, by race and sex\***

|                                                                                                                               | Total Population    |                     | White Americans     |                     | Black Americans     |                     |
|-------------------------------------------------------------------------------------------------------------------------------|---------------------|---------------------|---------------------|---------------------|---------------------|---------------------|
| PRS                                                                                                                           | Male                | Female              | Male                | Female              | Male                | Female              |
| Low                                                                                                                           | 28% (23.7%-32.8%)   | 12.5% (10.1%-15.4%) | 29.1% (24.0%-35.0%) | 11.6% (9.2%-14.5%)  | 23.4% (16.3%-32.9%) | 13.4% (8.7%-20.4%)  |
| Years free of CHD                                                                                                             | 79.1 ± 0.522        | 83.4 ± 0.415        | 79.4 ± 0.58         | 84.1 ± 0.41         | 78.3 ± 1.01         | 81.4 ± 0.95         |
| Intermediate                                                                                                                  | 37.4% (33.6%-41.6%) | 19.2% (17.4%-21.2%) | 41.0% (35.3%-47.3%) | 17.8% (15.8%-20.1%) | 28.0% (23.4%-33.4%) | 23.1% (19.5%-27.3%) |
| Years free of CHD                                                                                                             | 76.6± 0.294         | 81.4± 0.261         | 76.7 ± 0.33         | 82.2 ± 0.29         | 75.9 ± 0.69         | 79.2 ± 0.56         |
| High                                                                                                                          | 37.4% (33.6%-41.6%) | 28.6% (24.9%-32.7%) | 51.3% (46.2%-56.6%) | 30.0% (25.7%-34.9%) | 35.0% (27.1%-44.3%) | 25.5% (19.3%-33.4)  |
| Years free of CHD                                                                                                             | 72.5± 0.805         | 79.7± 0.617         | 71.4 ± 1.19         | 80.0 ± 0.47         | 75.9 ± 1.17         | 78.2 ± 2.24         |
| LS7                                                                                                                           |                     |                     |                     |                     |                     |                     |
| Ideal                                                                                                                         | 28.0% (24.7%-31.5%) | 9.3% (7.1%-12.0%)   | 29.5% (26.0%-33.3%) | 9.0% (6.9%-11.7%)   | 8.4% (4.1%-17.0%)   | 17.2% (5.8%-44.6%)  |
| Years free of CHD                                                                                                             | 80.5 ± 0.453        | 85.9± 0.301         | 80.4 ± 0.48         | 85.9 ± 0.31         | 81.6 ± 1.04         | 85.0 ± 1.12         |
| Intermediate                                                                                                                  | 39.4% (36.3%-42.8%) | 22.4% (20.5%-24.3%) | 43.1% (38.9%-47.5%) | 22.7% (20.6%-24.9%) | 27.5% (23.4%-32.2%) | 21.1% (17.8%-24.9%) |
| Years free of CHD                                                                                                             | 75.5± 0.348         | 80.3 ± 0.318        | 75.2 ± 0.439        | 80.7 ± 0.29         | 77.0 ± 0.59         | 79.8 ± 0.69         |
| Poor                                                                                                                          | 51.6% (44.3%-59.3%) | 37.3% (31.8%-43.4%) | 53.9% (43.7%-64.7%) | 41.9% (33.1%-52.1%) | 49.4% (38.9%-60.9%) | 33.3% (26.7%-41.0%) |
| Years free of CHD                                                                                                             | 67.2± 1.196         | 72.4 ± 0.931        | 66.2 ± 1.87         | 70.2 ± 1.616        | 68.4 ± 1.35         | 73.9 ± 1.12         |
| LS7: Life's Simple 7, PRS: polygenic risk score                                                                               |                     |                     |                     |                     |                     |                     |
| *Data are cumulative incidence functions and 95% confidence intervals and Irwin's restricted mean survival and standard error |                     |                     |                     |                     |                     |                     |

**Supplemental Table 6. Lifetime risk of CHD according to polygenic risk and Life's Simple 7\***

|                                                                                                                                                       | <b>No Family History</b> | <b>Family History of CHD</b> | <b>Family History of premature CHD</b> |
|-------------------------------------------------------------------------------------------------------------------------------------------------------|--------------------------|------------------------------|----------------------------------------|
| <b>Overall</b>                                                                                                                                        | 26.1% (23.7%-28.6%)      | 29.4% (27.3%-31.6%)          | 32.0% (27.9%-36.4%)                    |
| <b>PRS</b>                                                                                                                                            |                          |                              |                                        |
| Low                                                                                                                                                   | 19.0% (16.2%-22.1%)      | 21.3% (16.2%-27.7%)          | 15.6% (8.5%-27.7%)                     |
| Intermediate                                                                                                                                          | 25.6% (22.6%-29.0%)      | 28.6% (26.1%-31.3%)          | 29.9% (25.4%-35.1%)                    |
| High                                                                                                                                                  | 34.3% (30.2%-38.8%)      | 39.2% (34.5%-44.2%)          | 44.6% (36.2%-53.9%)                    |
| <b>LS7</b>                                                                                                                                            |                          |                              |                                        |
| Ideal                                                                                                                                                 | 15.7% (13.1%-18.9%)      | 17.6% (14.8%-20.8%)          | 17.9% (13.2%-24.2%)                    |
| Intermediate                                                                                                                                          | 28.4% (25.6%-31.5%)      | 32.3% (29.8%-35.1%)          | 36.9% (31.6%-42.8%)                    |
| Poor                                                                                                                                                  | 42.3% (36.1%-49.1%)      | 43.7% (36.6%-51.5%)          | 38.9% (26.9%-54.0%)                    |
| CHD: coronary heart disease, LS7: life's simple 7, PRS: polygenic risk score<br>*Data are cumulative incidence functions and 95% confidence intervals |                          |                              |                                        |

**Supplemental Table 7: Lifetime risk of CHD according to polygenic risk and family history of CHD\***

|                                                                                                                                 | <b>No Family History</b> | <b>Family History of CHD</b> | <b>Family History of premature CHD</b> |
|---------------------------------------------------------------------------------------------------------------------------------|--------------------------|------------------------------|----------------------------------------|
| <b>White Americans</b>                                                                                                          |                          |                              |                                        |
| <b>PRS</b>                                                                                                                      |                          |                              |                                        |
| Low                                                                                                                             | 18.4% (15.5%-21.8%)      | 21.7% (16.4%-28.4%)          | 16.3% (8.7%-29.4%)                     |
| Intermediate                                                                                                                    | 26.7% (22.6%-31.3%)      | 28.7% (26.0%-31.7%)          | 30.2% (25.3%-35.7%)                    |
| High                                                                                                                            | 36.8% (31.7%-42.4%)      | 41.5% (36.4%-47.0%)          | 43.9% (35.3%-53.6%)                    |
| <b>Black Americans</b>                                                                                                          |                          |                              |                                        |
| <b>PRS</b>                                                                                                                      |                          |                              |                                        |
| Low                                                                                                                             | 20.7% (14.4%-29.2%)      | 16.0% (9.0%-27.6%)           | 6.7% (1.0%-38.9%)                      |
| Intermediate                                                                                                                    | 22.9% (19.6%-26.7%)      | 27.5% (21.9%-34.1%)          | 27.4% (16.7%-42.9%)                    |
| High                                                                                                                            | 28.6% (22.3%-36.1%)      | 26.5% (18.4%-37.2%)          | 58.1% (32.5%-85.5%)                    |
| CHD: coronary heart disease, PRS: polygenic risk score<br>*Data are cumulative incidence functions and 95% confidence intervals |                          |                              |                                        |



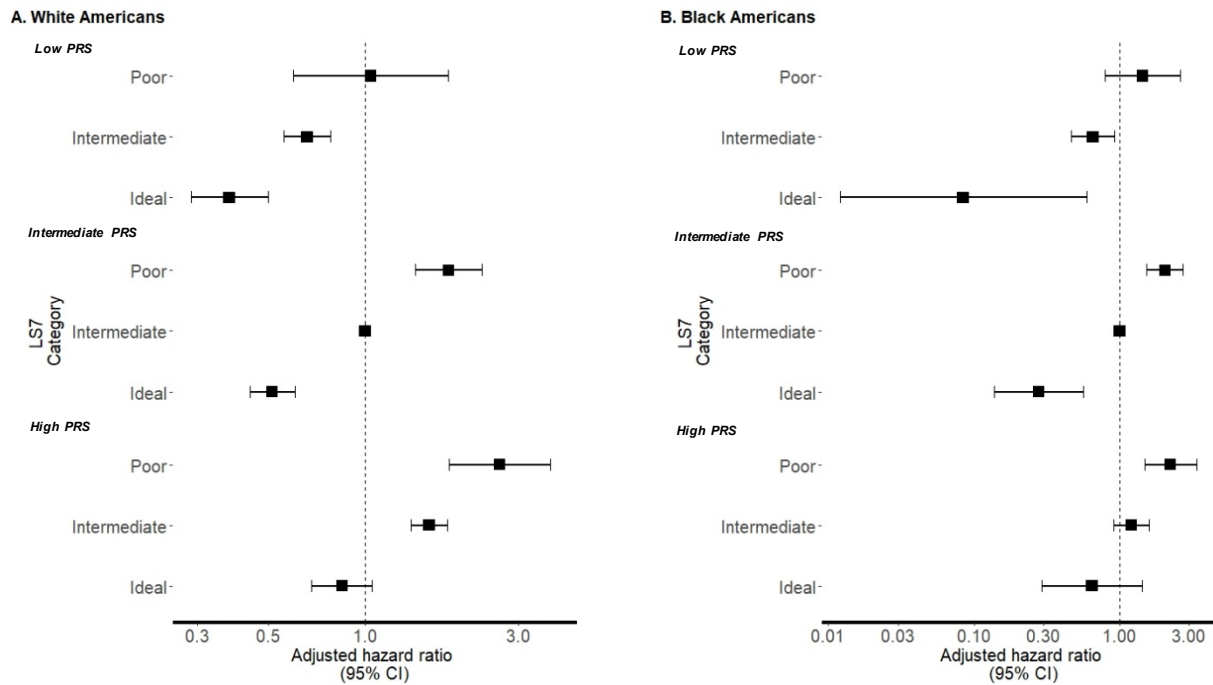

**Supplemental Figure 1. Relative risk of CHD according to polygenic risk and Life's Simple 7 according to race**

Figure is a forest plot represents the hazard ratio (HR) and 95% confidence interval for the joint effect of polygenic risk (PRS) and Life's Simple 7 (LS7) categories. Panel A reports estimates for White Americans and Panel B reports estimates for Black Americans. HRs were calculated accounting for the competing risk of death and adjusted for family history, sex and study center. Normal PRS and intermediate LS7 was used as the reference group.

**A. Male Participants**

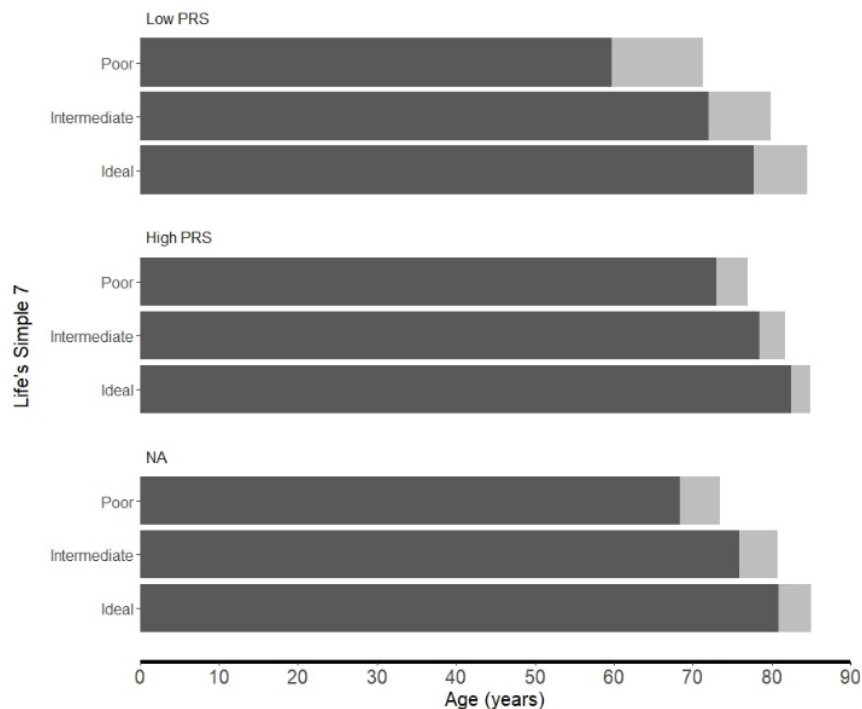

**B. Female Participants**

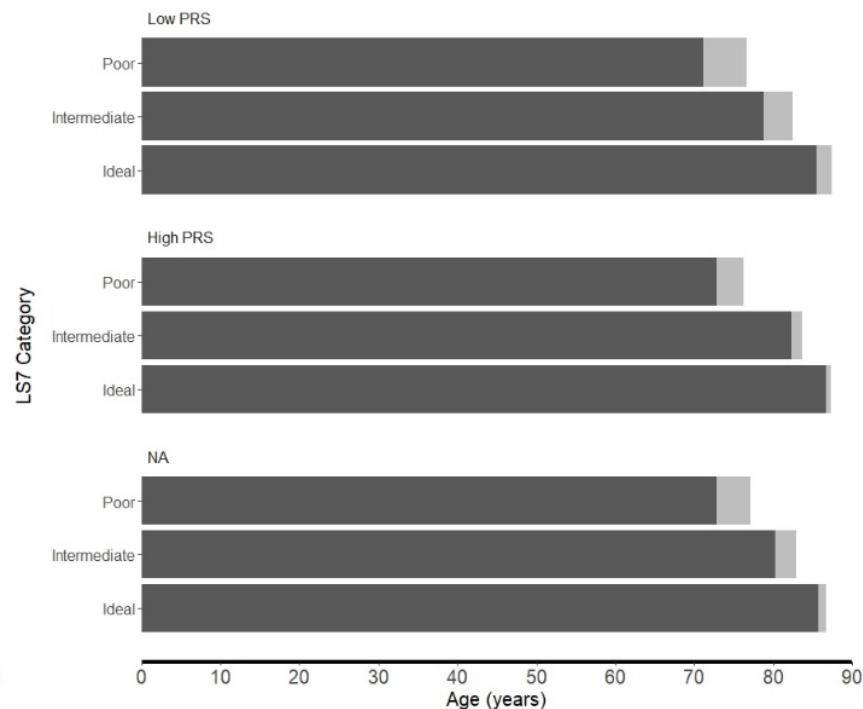

**Supplemental Figure 2. Years free of CHD and Overall Survival according to polygenic risk and lifestyle stratified by sex**

Figure is a bar plot, where each bar represent Irwin's restricted survival mean time for incident coronary heart disease (CHD), or years free of CHD, and overall survival for participants according to polygenic risk score (PRS) and life's simple 7 (LS7) score category. Panel A reports the data for all male participants and Panel B reports the data for all female participants. Years free of CHD is in dark gray and overall survival is light gray.
